# Supplementary material for: Omalizumab Restores Response to Corticosteroids in Patients with Eosinophilic Chronic Rhinosinusitis and Severe Asthma
Source: MDPI journal article supplement (doi:10.3390/biomedicines9070787), 2021-07-07
Supplement: s1 [file s1]

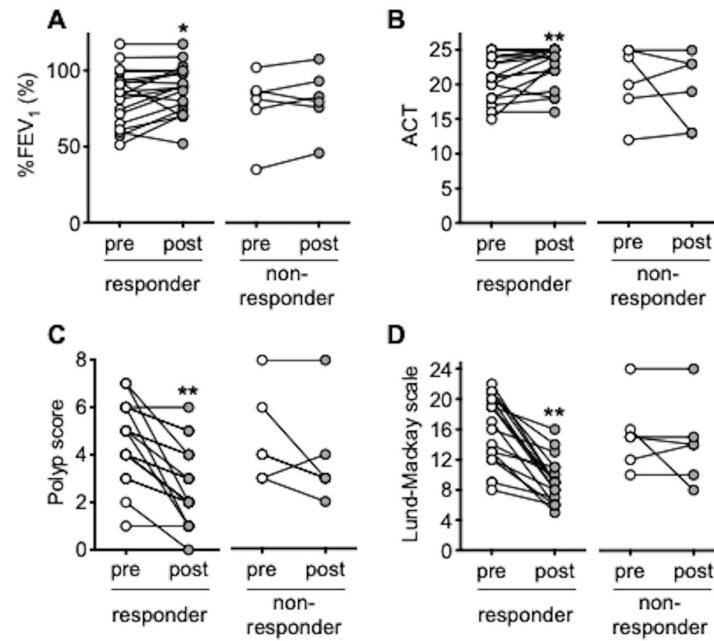

**Figure S1.** Effect of omalizumab on pulmonary function and sinusitis. FEV<sub>1</sub> (A), Asthma Control Test (ACT) (B), polyp score (C) and sinus CT score (D) were evaluated pre- and post-treatment with omalizumab. Individual values of the responder group ( $n = 19$ ) and the non-responder group ( $n = 6$ ) are shown; \*  $P < 0.05$ , \*\*  $P < 0.01$  (vs. pre-treatment).

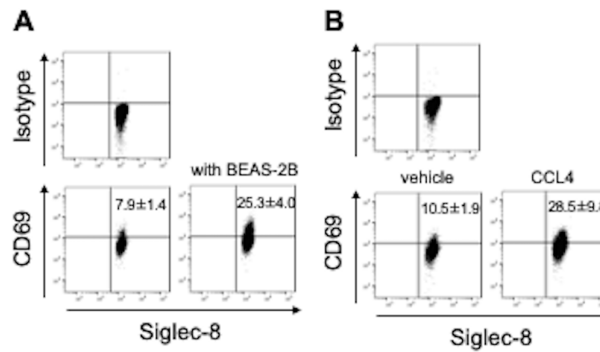

**Figure S2.** CD69 expression on human eosinophils. Purified peripheral blood eosinophils were incubated with BEAS-2B cells (A) or CCL4 (10  $\mu\text{g/mL}$ ) (B) overnight. CD69 expression on eosinophils was evaluated. Values in dot-plot panels (% of CD69+ Siglec-8+ double-positive cells) represent the mean  $\pm$  SEM values of four experiments.

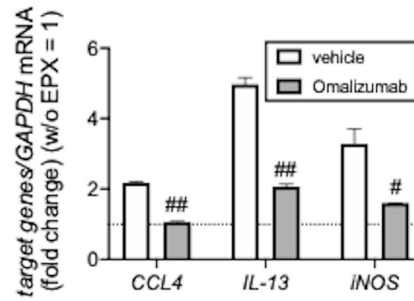

**Figure S3.** Effect of omalizumab on indicators of type 2 inflammation. BEAS-2B cells co-incubated with recombinant eosinophil peroxidase (EPX, 10µg/mL; Proteintech, Rosemont, IL, USA) for 72 h were treated with omalizumab (10 µg/mL) overnight. mRNA levels of CCL4, IL-13 and iNOS in BEAS-2B cells were evaluated. Values in panel represent the mean ± SEM values of three experiments; \* $P < 0.05$ , \*\* $P < 0.01$  (vs. non-treatment control without EPX).

**Table S1.** Amplification primers (5'–3')

| gene          | forward                         | reverse                         |
|---------------|---------------------------------|---------------------------------|
| <i>PPP2CA</i> | CGC CAT TAC AGA GAG CCG AG      | GTA CTT CTG GCG GCT GTT GA      |
| <i>CCL4</i>   | CTC CTC ATG CTA GTA GCT GCC TTC | GGT GTA AGA AAA GCA GCA GGC GGT |
| <i>IL-13</i>  | CTG ACA GCT GGC ATG TAC TGT G   | TGT CTC GGA CAT GCA AGC TG      |
| <i>iNOS</i>   | ATC TCT GGT CAA GCT GGA TGC     | GCC TTA TGG TGA AGT GTG TCT TG  |
| <i>GAPDH</i>  | TTC ACC ACC ATG GAG AAG GC      | AGG AGG CAT TGC TGA TGA TCT     |
